# Supplementary material
Source: PubMed Central journal article supplement (PMC3296045)
Supplement: mmc1.pdf [file mmc1.pdf]

## Supporting Material

### Supramolecular non-amyloid intermediates in the early stages of $\alpha$ -synuclein aggregation

Jonathan A. Fauerbach<sup>†</sup>, Dmytro A. Yushchenko<sup>‡</sup>, Sarah H. Shahmoradian<sup>§¶</sup>, Wah Chiu<sup>§¶</sup>,  
Thomas M. Jovin<sup>\*†</sup>, Elizabeth A. Jares-Erijman<sup>\*†</sup>

<sup>†</sup>Departamento de Química Orgánica, Facultad de Ciencias Exactas y Naturales, Universidad de Buenos Aires (UBA), CIHIDECAR CONICET, Buenos Aires, Argentina, <sup>‡</sup>Laboratory of Cellular Dynamics, Max Planck Institute for Biophysical Chemistry (MPIbpc), Göttingen, Germany and Laboratorio Max Planck de Dinámica Celular (UBA), <sup>§</sup>Department of Molecular Physiology and Biophysics, <sup>¶</sup>National Center for Macromolecular Imaging, and the Verna and Marrs McLean Department of Biochemistry and Molecular Biology, Baylor College of Medicine, Houston, TX 77030, USA.

**\*Corresponding authors:** Prof. Dr. Elizabeth A. Jares-Erijman, Departamento de Química Orgánica, Facultad de Ciencias Exactas y Naturales, Universidad de Buenos Aires (UBA), Ciudad Universitaria, Intendente Güiraldes 2160, 1428 Buenos Aires, Argentina. Tel/Fax: +54-11-4576-3346; e-mail: [eli@qo.fcen.uba.ar](mailto:eli@qo.fcen.uba.ar); Dr. Thomas M. Jovin, Max Planck Institute for Biophysical Chemistry, am Fassberg 11, 37077 Göttingen, Germany. Tel: +49-551-2011382; Fax: +49-551-2011467; Email: [tjovin@gwdg.de](mailto:tjovin@gwdg.de).

#### *Purification, labeling and preparation of $\alpha$ -synuclein*

**AS purification.** Wildtype human  $\alpha$ -synuclein (wtAS) and monocysteine mutants were expressed in *E. coli* BL21 (DE3) cells. The production of the recombinant protein was according to a 2009-2010 protocol (currently being revised) of the Laboratory of Cellular Dynamics (MPIbpc). Transformation was with pT7-7 plasmids encoding wildtype and mutant protein sequences. Expression was initiated by inoculation of a volume of 900 ml LB medium with 100 ml of a pre-culture and addition of 1 ml of 100 mg/ml ampicilin. Incubation was carried out at 37 °C with agitation (400 rpm) until the  $A_{600}$  reached a value of 0.5-0.8. Expression of the recombinant protein was induced by addition of IPTG and incubation was continued for an additional 4-6 h. The bacterial cells were harvested by centrifugation (Beckman JA10 rotor, 5000 rpm, 30 min 4 °C) and the pellets were stored at -20 °C. Cell pellets were thawed with 15- 20 ml lysis buffer containing 10 mM Tris-HCl, pH 7.7, 1 mM EDTA and 1 mM protease inhibitor PMSF. In the case of cysteine-containing mutants, 5 mM dithiothreitol (DTT) was added. Three freeze-thaw cycles were performed with liquid N<sub>2</sub> and 70 °C hot water. The cells were lysed by sonication using a Fisher Scientific Digital Sonic Dismembrator Model 500 with a 6.5 mm diameter Branson microtip. Cells were subjected to three 10 s periods of sonication at 50% maximum amplitude, with 10 s intervals on ice. The extract was centrifuged 15 min at 2500×g and the supernatant was recovered. Proteins other than AS were denatured/precipitated by boiling at 100 °C for 20 min followed by centrifugation at 37000×g for 30 min at 4 °C. DNA was removed by addition of streptomycin sulfate to the supernatant to a final concentration of 10 mg/ml, agitation of the solution for 15 min at 4 °C, and centrifugation for 30 min at 4 °C and 37000×g. AS was precipitated from the supernatant by addition of solid (NH<sub>4</sub>)<sub>2</sub>SO<sub>4</sub> to a final concentration of 360 mg/ml and subsequent centrifugation as above. The pellets containing AS were stored at -20 °C. Purification of AS was carried out with a GE Healthcare ÄKTA explorer FPLC system equipped

47 with an Applied Biosystems POROS HQ 20  $\mu\text{m}$ , 4.6 $\times$ 100 mm (1.7 ml) column. Samples were  
48 concentrated with Millipore Amicon 10 kDa filters and ultracentrifuged for 1 hour at  $10^5\times g$  in a  
49 Beckman 80 TLS-55 rotor. The supernatant was recovered, diluted to a convenient concentration  
50 and frozen with liquid  $\text{N}_2$ , with storage at  $-80^\circ\text{C}$ .

51 **Protein labeling.** MFC was synthesized as described (1). For the labeling procedure, MFC  
52 was dissolved in DMSO and mixed dropwise with a solution of  $\sim 300\ \mu\text{M}$  AS-A140C in 25 mM  
53  $\text{Na-PO}_4$  pH 7.3, 3 mM tris(2-carboxyethyl)phosphine (TCEP) ; the final DMSO:buffer ratio was  
54 1:2. MFC was in a 5-10-fold molar excess over the protein. After the complete addition of the  
55 MFC-DMSO solution and confirming the lack of a precipitate, the mixture was left at  $4^\circ\text{C}$  under  
56 stirring overnight (ON). The next day the reaction mixture was diluted 10-fold with 25 mM  $\text{Na-PO}_4$   
57 pH 7.3, 3 mM TCEP and concentrated by 3-4 passages through a Millipore Amicon 10 kDa  
58 filter to a volume of  $\sim 1$  ml in order to remove DMSO from the reaction mixture. A size exclusion  
59 PD-10 column was used as a first step of purification from the unbound dye. A Pharmacia Smart  
60 chromatography system was used with a Superdex 200 column (10/300) and 25 mM Tris-HCl, pH  
61 7.2, 150 mM NaCl elution buffer to separate thoroughly the excess reagent from the labeled  
62 protein and the unlabeled protein. The extent of labeling was 50-70%. Samples were frozen with  
63 liquid  $\text{N}_2$  and stored at  $-80^\circ\text{C}$ .

64 **Aggregation assays.** Aggregation assays of wtAS protein incubated together with labeled  
65 AS with the MFC ESIPT probe were performed at  $37$  and  $70^\circ\text{C}$  in  $5\times 5$  mm Hellma 111.057-QS  
66 cuvettes, tightly sealed with Teflon stoppers to avoid solvent evaporation. Mixing was done with a  
67 parylene coated tumble disk (V&P Scientific, San Diego CA). Aggregation assays were performed  
68 in a continuous manner in a temperature controlled Cary Eclipse spectrofluorometer (Varian,  
69 Australia) (1). The excitation wavelength was  $345\ \text{nm}$  with a  $342\pm 10\ \text{nm}$  bandpass filter added to  
70 suppress scattering of out-of-band light. The excitation and emission slits were adjusted to  $5\ \text{mm}$ .  
71 Fluorescence spectra were recorded from  $365$ - $700\ \text{nm}$  every  $30\ \text{min}$  during the first  $48\ \text{h}$  of  
72 reaction and every  $1\ \text{h}$  thereafter up to  $180\ \text{h}$ . The ESIPT  $\text{N}^*$  and  $\text{T}^*$  bands were located at  $420$  and  
73  $520\ \text{nm}$ , respectively. Mixers were fixed at  $600\ \text{rpm}$  and controlled by a homemade stirring device  
74 controlled by a National Instruments LabVIEW VI script generated in the Laboratory of Cellular  
75 Dynamics. The aggregation buffer was 25 mM  $\text{Na-PO}_4$ , pH 6.2, 0.02%  $\text{NaN}_3$ . ThioT assays were  
76 performed in 50 mM Na-glycine buffer, pH 8.2, with excitation at  $446\ \text{nm}$  and emission at  $482$   
77 nm. Two types of samples were prepared for *in vitro* aggregation experiments: a) 97.5% wtAS +  
78 2.5% AS140-MFC, and b) 100% wtAS. The total protein concentration was  $150\ \mu\text{M}$  in all cases.  
79 In the case of cold aggregations, the temperature was maintained at  $4^\circ\text{C}$  without agitation. Samples  
80 were taken at given intervals for AFM measurements.

81 **Ultracentrifugation of AS monomer.** In order to achieve reproducible conditions and results  
82 in the aggregation assays, it is important to clear the starting material of sub- $\mu\text{m}$  aggregates.  
83 Ultracentrifugation (1 h at  $10^5\times g$ ) was effective. Fig. S1 shows a sample of monomeric wtAS  
84 before and after ultracentrifugation; the importance of this step is apparent.

85

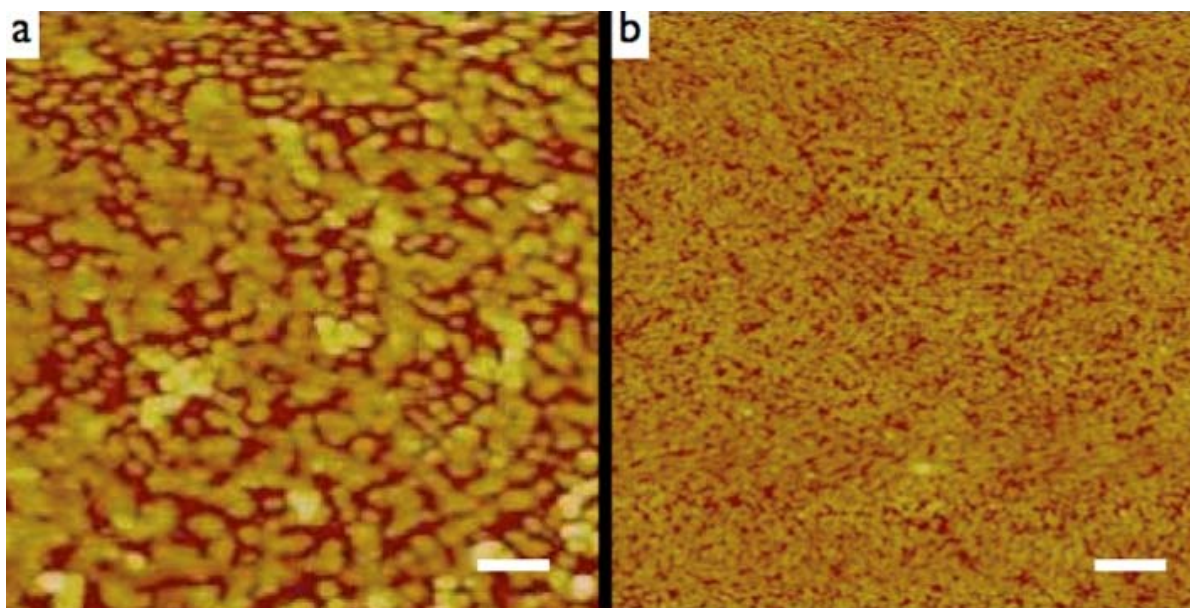

86  
87 **FIGURE S1.** Ultracentrifugation of wt AS starting material. (a) AFM image of wtAS without ultracentrifugation. (b)  
88 AFM image of the same sample ultracentrifuged 1 h at  $10^5\times g$ . Scale bar, 300 nm.

89

90

### *Atomic force microscopy*

91 **Sample preparation.** AFM was performed with a Veeco Nanoscope Models III and V, using  
92 silicon nitride tips ( $\mu$ mash) with 10 nm radius and 300 KHz drive frequency for air tapping mode  
93 imaging. Unless otherwise indicated, samples were applied to freshly cleaved mica surface by  
94 spin-coating, a procedure which is very effective in uniformly depositing heterogeneous samples  
95 without a directional drying bias by virtue of the very rapid, isotropic loss of solvent normal to the  
96 surface. The spin-coating process can be described by 3 stages: a) deposition, b) centrifugation,  
97 and c) drying of the sample. In the first stage, 10  $\mu$ l of a 10-fold dilution of the original sample  
98 with Milli-Q water is applied over the mica and left for 1 min to promote interactions with the  
99 substrate. The substrate is then accelerated up to the final desired rotation speed (typically 2000  
100 rpm), leading to aggressive fluid expulsion from the surface due to the centrifugal force. The final  
101 stage consists of the substrate spinning at a constant rate for a given time (generally 2 min), during  
102 which solvent evaporation dominates the processes of thinning and coating. The samples are then  
103 ready for AFM imaging, and can be maintained for >1 year at room temperature without signs of  
104 significant degradation in subsequent scans (see Figs. S13, 14).

105  
106 **AFM controls.** After thorough study of the *in vitro* aggregation of wtAS using 3% of labeled  
107 protein with the MFC probe, we decided to use a different probe (pyrene) in order to rule out any  
108 direct probe-effects. A 300  $\mu$ l sample was prepared containing 96% wtAS + 4% AS-A140C-  
109 pyrene (2) (total protein concentration 150  $\mu$ M) in 25 mM Na-PO<sub>4</sub> buffer, pH 6.2. The solution  
110 was incubated in a 1.5 ml tube in an Eppendorf thermomixer at 37 °C and 600 rpm for 11 h. Figure  
111 S2 shows AFM images of a 10-fold dilution of the sample; 10  $\mu$ l of the dilution was placed over  
112 mica and spin-coated.



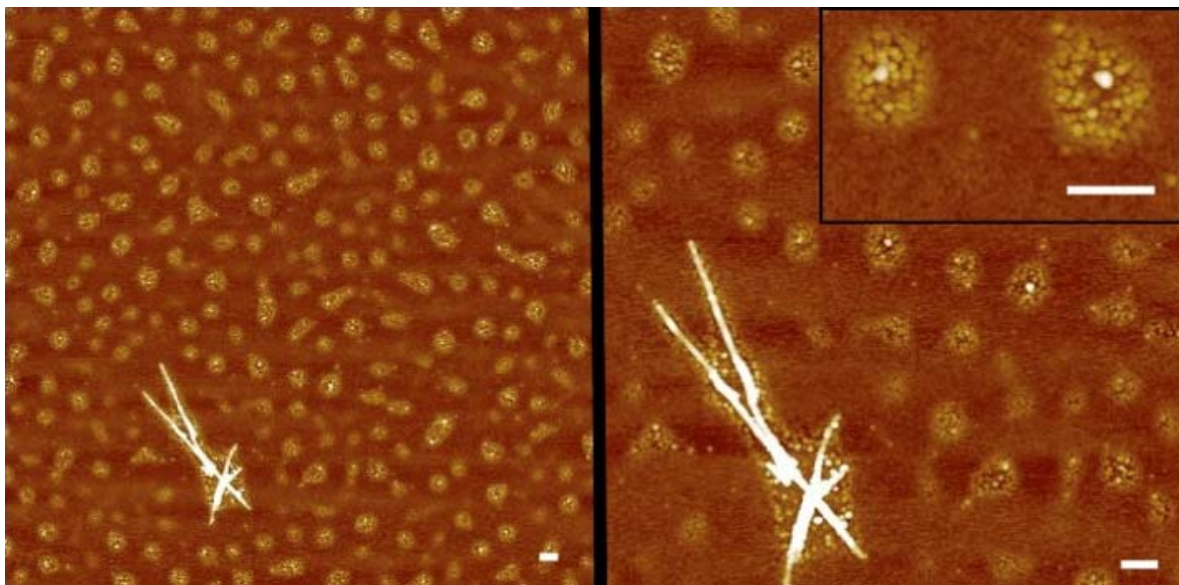

113

114 **FIGURE S2.** AFM images of acunas prepared at 37 °C from 96% wtAS + 4% AS-A140C-pyrene in 25 mM Na-PO<sub>4</sub>  
115 buffer, pH 6.2, incubated in a thermomixer at 600 rpm for 11 h. A sample was diluted 10-fold with Milli-Q water  
116 (final [AS] 14 μM, [buffer] 2.5 mM), applied to freshly cleaved mica and spin-coated.

117 After confirmation of the presence of acunas, the solution was maintained at 4 °C for 1 week,  
118 at which time a new 10-fold dilution was prepared and scanned (Fig. S3). Acunas were still  
119 present, indicating that cooling to 4 °C had aborted the aggregation reaction and preserved the  
120 acuna intermediates.

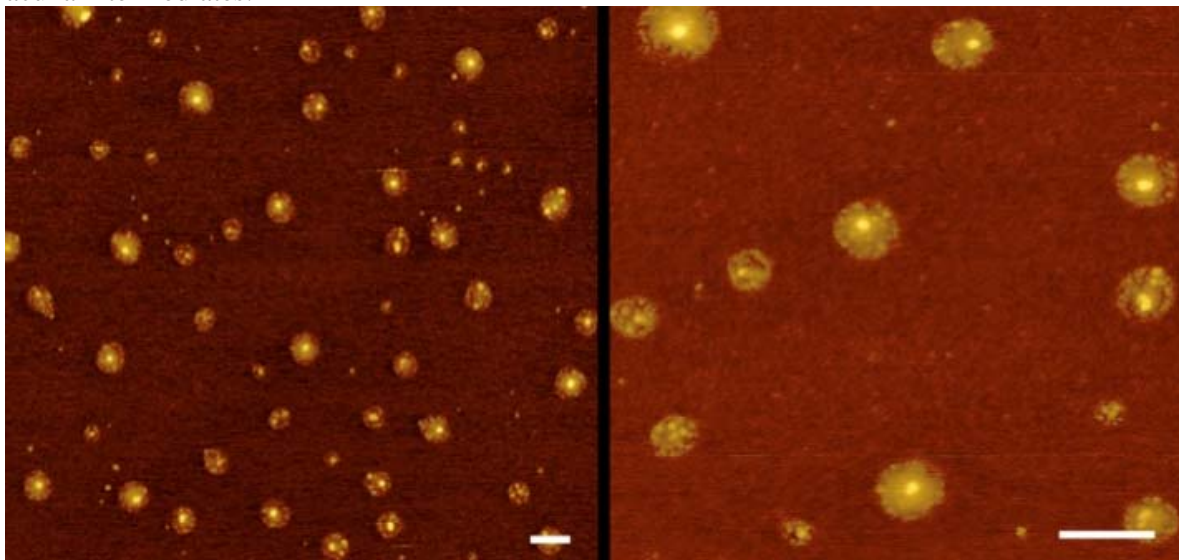

121

122 **FIGURE S3.** AFM images of the sample shown in Fig S2 and kept at 4 °C for 1 week. The sample was diluted 10-  
123 fold with Milli-Q water and spin-coated over mica. Scale bar, 300 nm.

124

125 Five μl of the same dilution (preserved in ice for 2 h) was placed on a new mica disk and  
126 allowed to evaporate during 30 min. inside a Petri dish. After the drop disappeared, the substrate  
127 was exposed to a gentle N<sub>2</sub> stream and then scanned (Fig. S4). Acunas were clearly visible,  
128 indicating that they had not arisen as an artifact of the spin-coating procedure.  
129

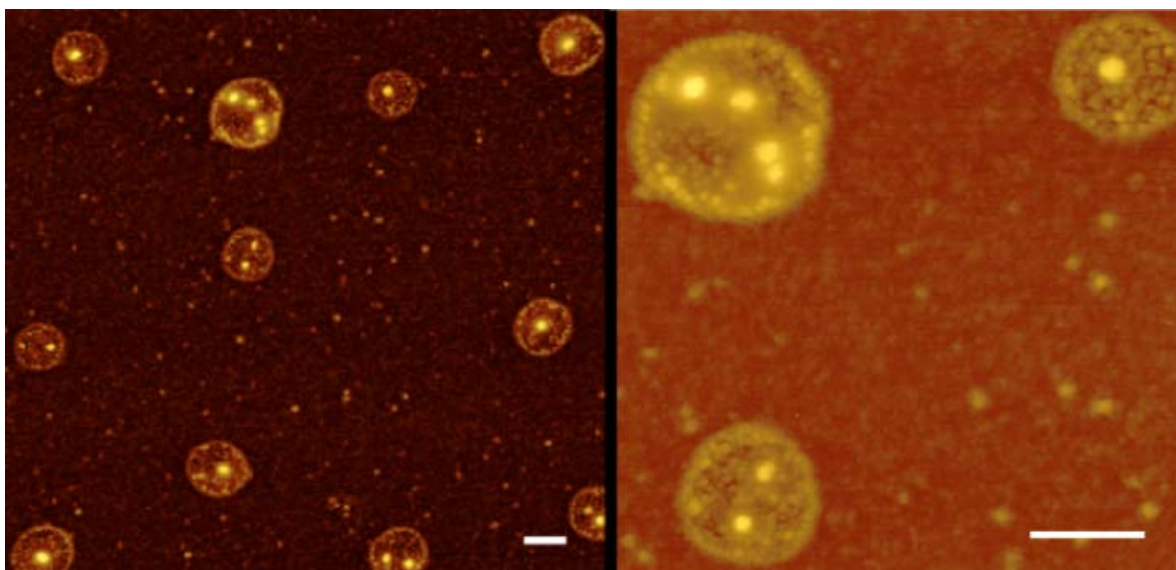

130

131 **FIGURE S4.** AFM images of the sample showed in Fig. S2 but evaporated over mica without spin-coating. [AS] 14  
132  $\mu\text{M}$  and [buffer] 2.5mM. Scale bar, 300 nm.

133 To study the effects of both salt and protein concentration on the morphology and stability of  
134 acunas, the sample described above was diluted a further 2-fold with water and applied to mica  
135 without spin-coating (Fig. S5). There was a partial loss in the structural definition of acunas and an  
136 increase in the amount of loose material in the background, indicating that the acunas require a  
137 certain ionic strength for stability.  
138

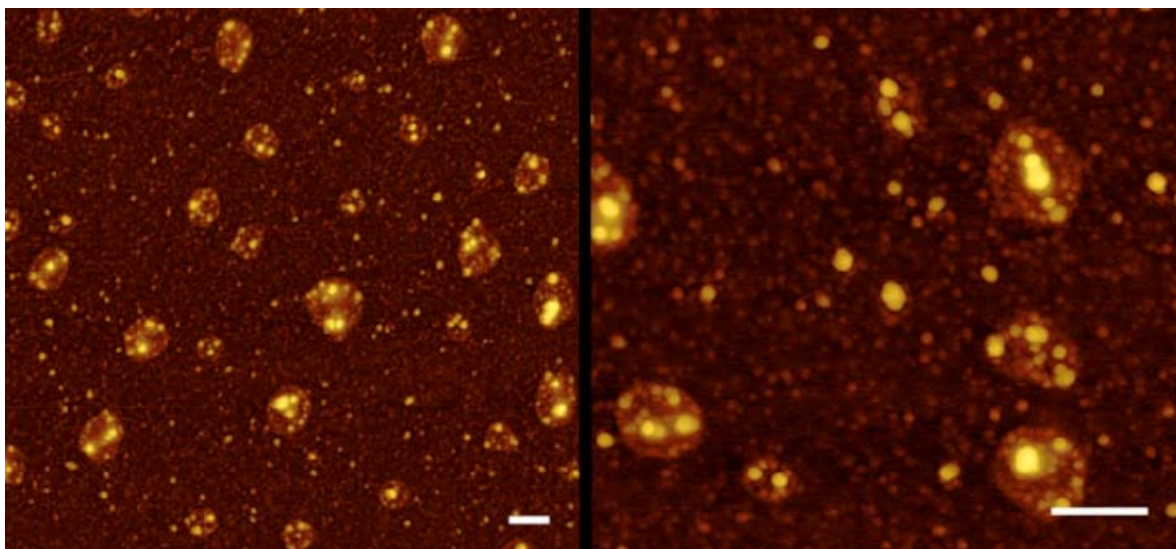

139

140 **FIGURE S5.** AFM images of same sample as in Fig. S2 but diluted an extra 2-fold with water, resulting in a 7  $\mu\text{M}$   
141 final AS concentration and 1.25 mM buffer. The sample was not spin-coated. Scale bar, 300 nm.

142 From the original sample kept at 4 °C (Fig. S2, S3) a new 50-fold dilution was prepared with 2.5  
143 mM buffer, such that the final AS concentration was 3  $\mu\text{M}$  in 2.5 mM buffer (Fig. S6). Acunas  
144 were still present and retained their shape, although they were somewhat more compact in  
145 appearance with much less loose material visible in the background, compared to Figure S5.  
146

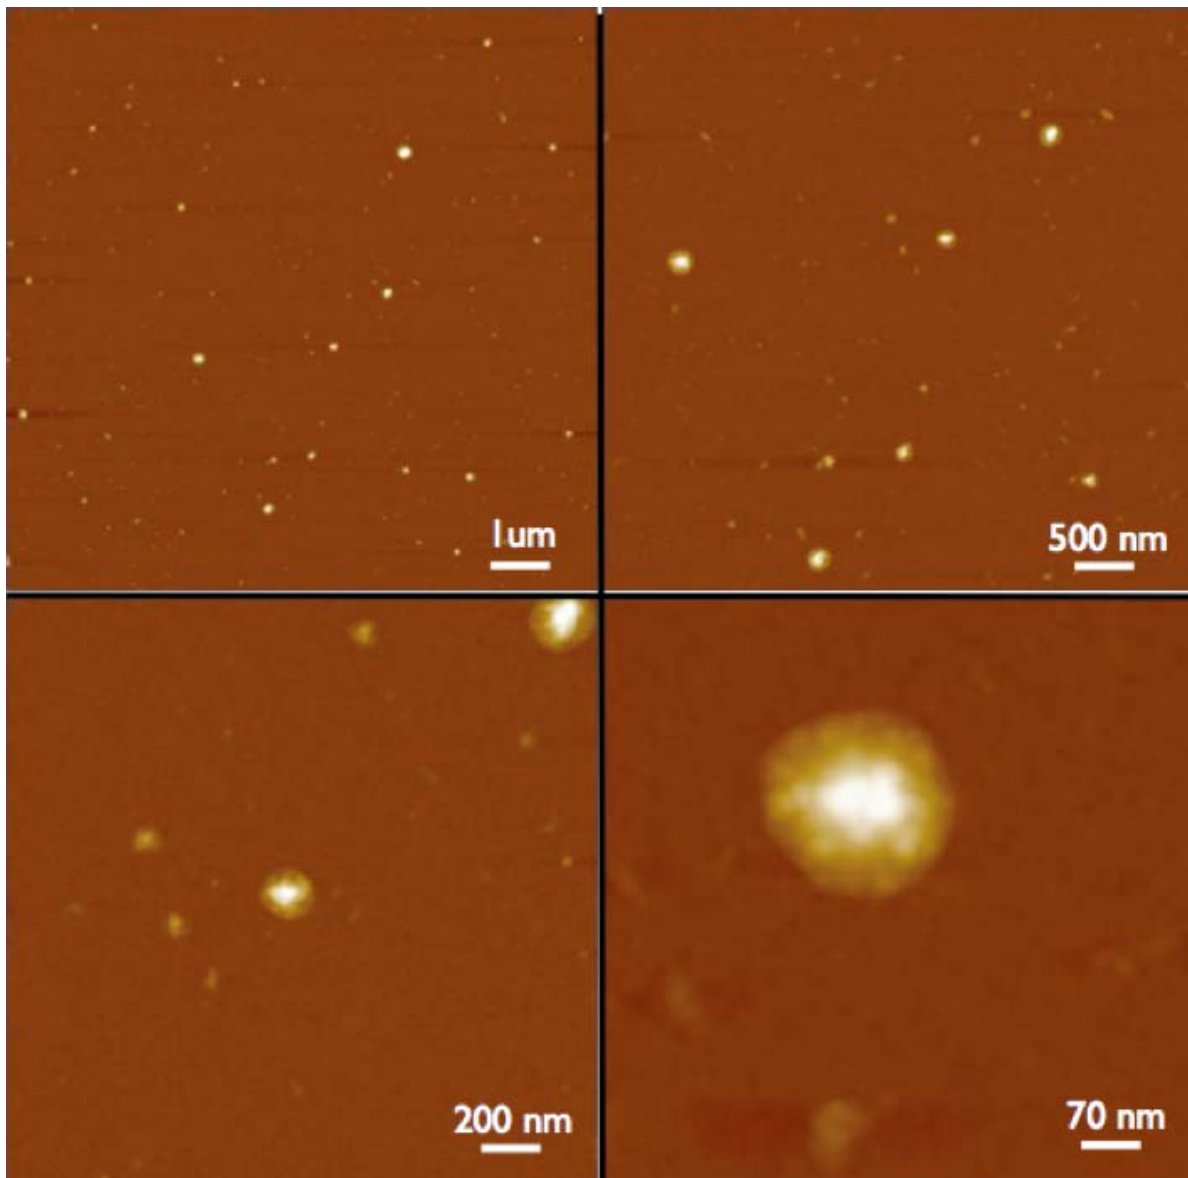

147  
148  
149

**FIGURE S6.** AFM images of same sample as in Fig. S2 but diluted an extra 50-fold with water, resulting in a 3  $\mu\text{M}$  final AS concentration and 2.5 mM buffer. The sample was not spin-coated.

150  
151  
152  
153

Finally, another 50-fold dilution was prepared but this time in 25 mM buffer, yielding 3  $\mu\text{M}$  protein and 25 mM buffer (Fig. S7). Acunas were visible but appeared in groups of 2, 3 or 4 with an intriguing fibrillation and fuzziness apparent on the surface.



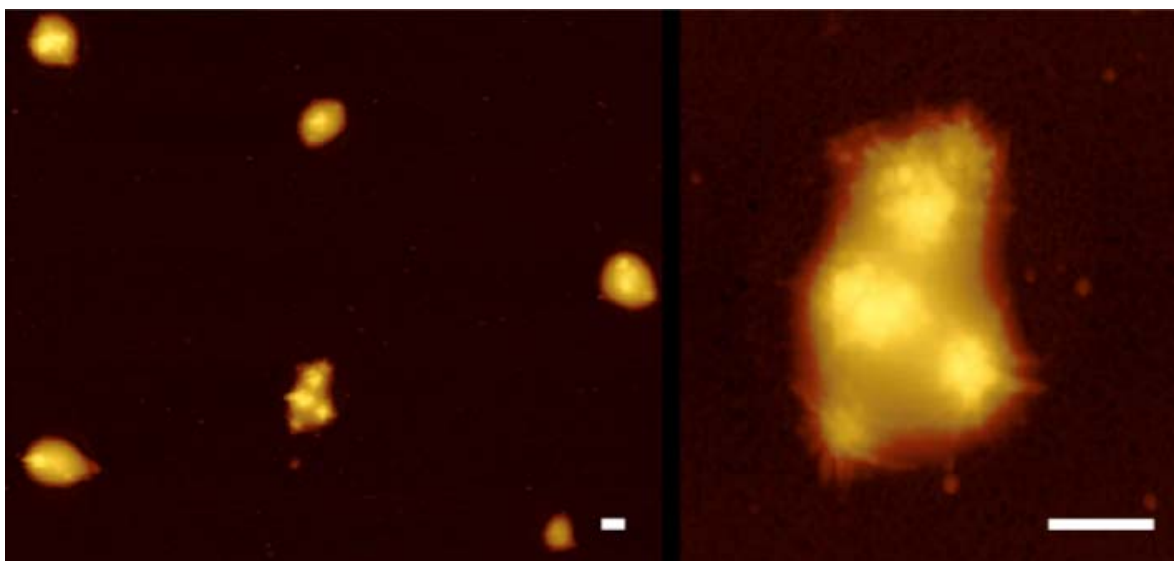

154

155 **FIGURE S7.** AFM image of same sample as in Fig. S2 but further diluted 5-fold with buffer of higher concentration  
156 (25 mM), yielding 3  $\mu$ M protein and 25 mM buffer. Scale bar, 300 nm.

157 AFM samples are often subjected to washing procedure *in situ* in order to reduce interference  
158 from residual salt after drying in air. Figure S8 shows the effect of introducing a washing step in  
159 the sample preparation protocol. The protocol was as follows: a) application of 10  $\mu$ l of sample  
160 (10 fold water dilution of original reaction) to freshly cleaved mica; b) 5 min incubation to permit  
161 protein-substrate interaction; c) removal of excess solution by capillarity using a paper tissue at the  
162 edge; d) application of 100  $\mu$ l of Milli-Q water; e) removal of liquid after 30 min by wicking with  
163 paper tissue; f) repetition of steps d and e; and g) drying with a gentle stream of N<sub>2</sub>. The washing  
164 steps produced a high background of small particulate material, particularly oligomeric-spheroidal  
165 and fuzzy balls. Depressions in the underlying layer are apparent, with the size and shapes of  
166 acunas imaged previously. In many cases, fuzzy fibers (see below) and residues of the underlying  
167 acuna backbone are present in these areas, indicative of a greater resistance of these structures to  
168 low ionic strength conditions.

169

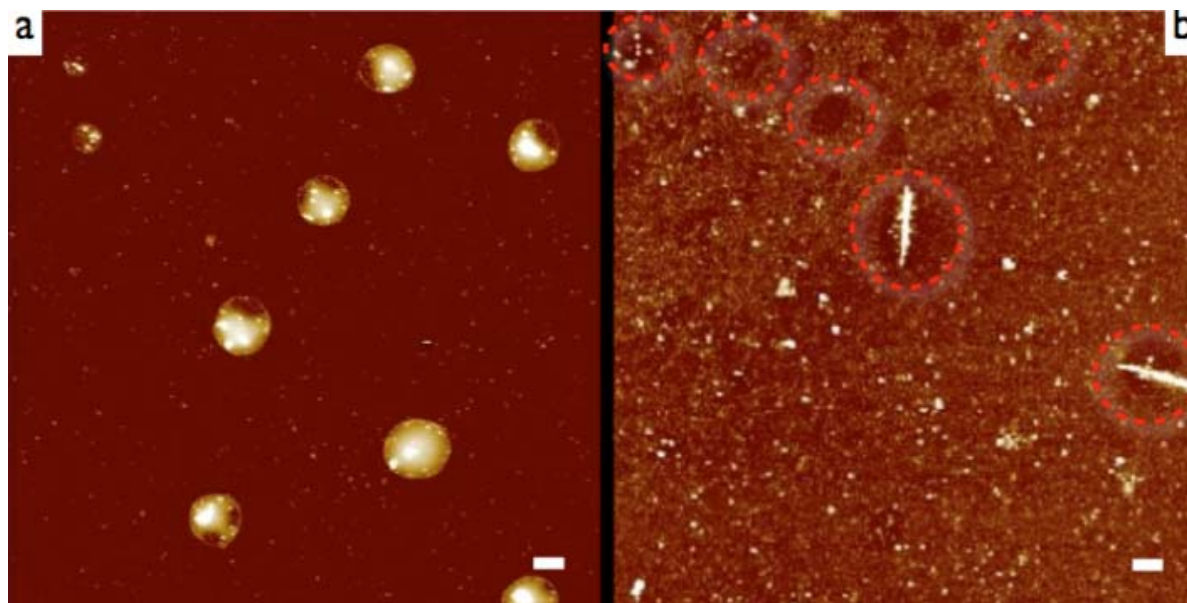

170

171 **FIGURE S8.** Washing out of acunas. (a) AFM image of a 10-fold dilution of wtAS + 4% AS-A90C-pyrene incubated  
172 11 hs at 37°C and then maintained at 4 °C. Sample not spin-coated but dried by evaporation during 30 min. (b) same  
173 sample treated according to the washing protocol (see above). Scale bar, 500 nm.

174 Acunas prepared at 4 °C were also imaged by AFM under liquid with a Nanoscope V glass  
175 liquid cell, and V-shape SiN<sub>2</sub> cantilevers of 0.06 N/m spring constant and 10 KHz drive frequency.  
176 A scanning buffer (25 mM Na-PO<sub>4</sub> pH 6.2, 2mM MgCl<sub>2</sub>) was used to flood the cell holding the  
177 cantilever and to dilute the sample. Thirty-to-forty µl of the scanning buffer was used to fill the  
178 liquid cell before engaging with the substrate. Air was removed and a hanging drop was formed.  
179 The laser was re-aligned and left for 20 min to achieve thermal equilibration. The mica substrate  
180 was pretreated with 25 mM MgCl<sub>2</sub>: 20 µl was spin-coated over the mica, which was then washed  
181 twice with 50 µl of water and dried. Forty-to-fifty µl of protein solution was mixed with 10-15 µl  
182 of scanning buffer, placed over the mica substrate, and left for 10 min for thermal equilibration  
183 and substrate interaction prior to scanning. A "water dome" was formed over the substrate. The  
184 final step before scanning was to establish contact between the water and the hanging drop,  
185 leading to coalescence. AFM under liquid is more difficult than in air due to the longer scan times  
186 required, evaporation of the liquid, dispersion of the sample, thermal effects, and laser position  
187 fluctuations; all these effects reduce image quality. The images exhibited a quantity of loose  
188 material on the reaction mixture and a lack of adhesion of the supramolecular structures to the  
189 substrate. The phase channel helped to visualize the acunas due to their higher density structure.  
190 Compact round-oval structures, 300-600 nm in size, were observed, clearly distinguishable from  
191 the background, in which loose material was apparent (Fig. S9).



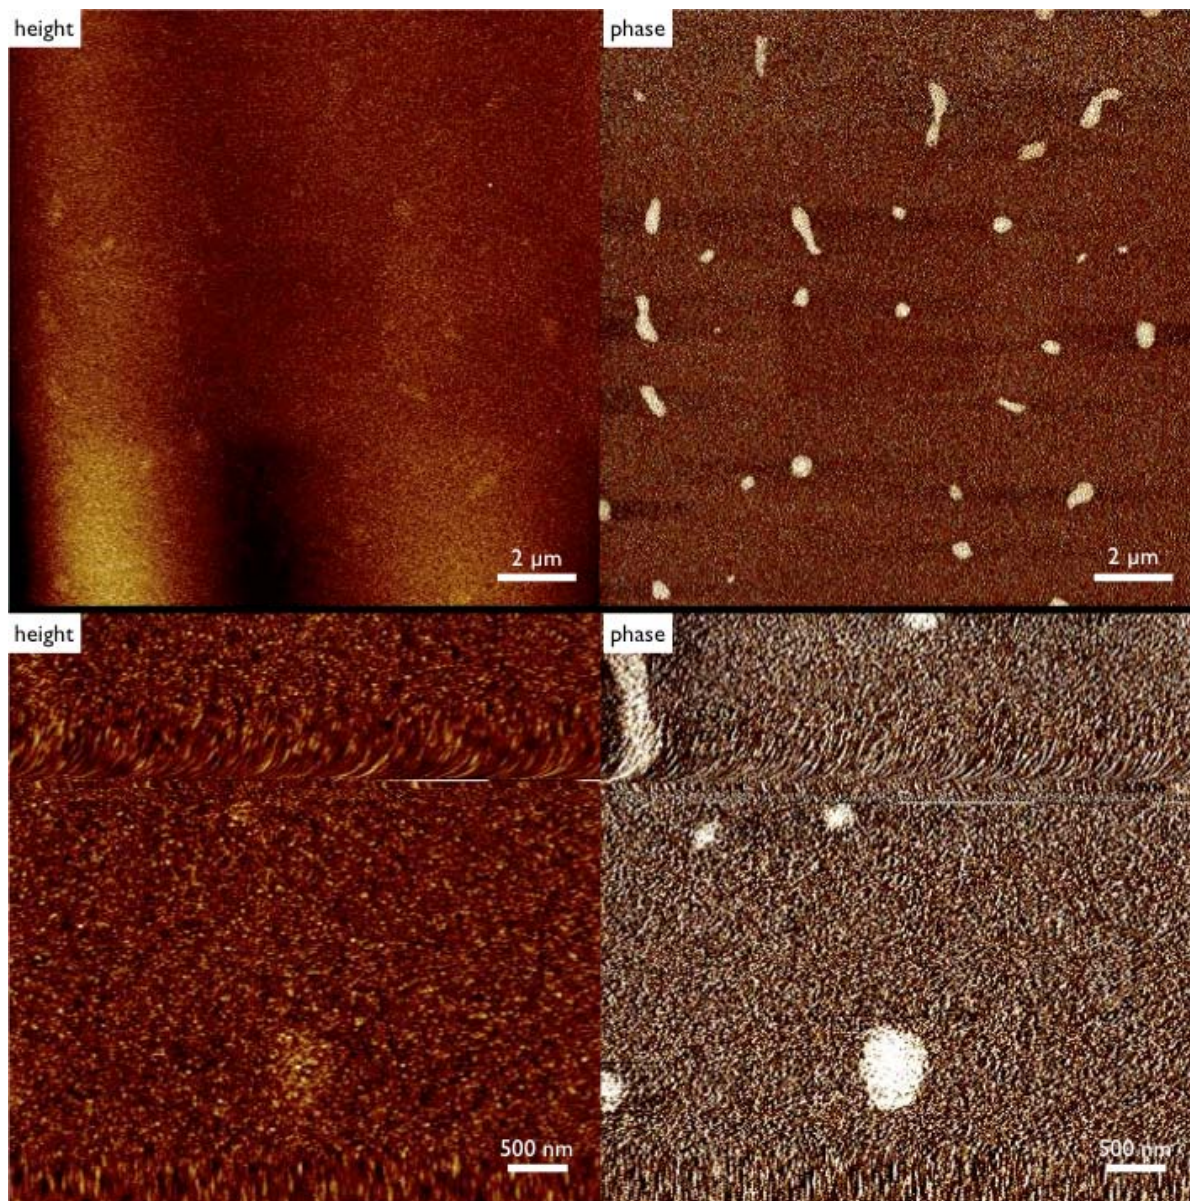

192

193 **FIGURE S9.** AFM images of latent acunas using liquid cell (under-liquid AFM). The height and phase channels are  
194 shown individually.

195 To exclude a potential influence of the mica substrate on sample appearance or orientation,  
196 AFM measurements were performed with samples spin-coated on flat glass substrates (Coherent  
197 FS superpolish substrate, Catalog# 45-1922-000). The AFM images revealed acunas as well as  
198 smaller structures (Fig. S10).

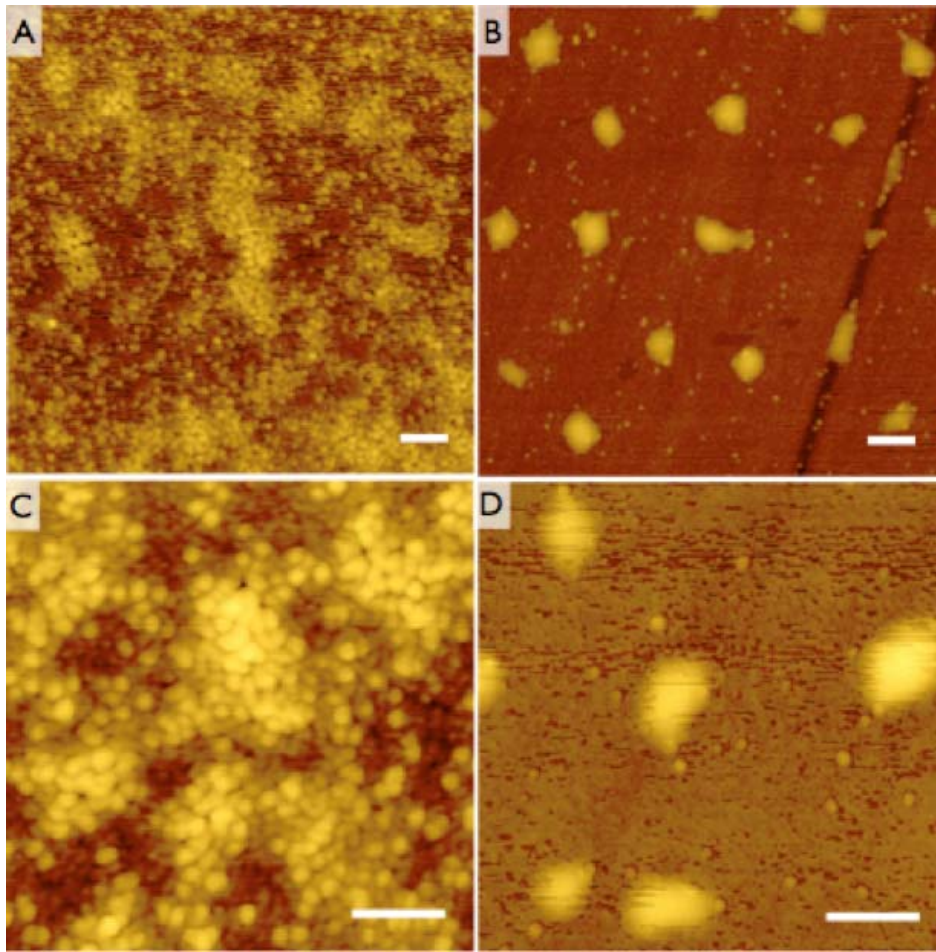

199  
200  
201  
202  
203

**FIGURE S10. AFM images of acunas on a glass surface.** A sample of latent acunas prepared at 4 °C from 300  $\mu$ M wtAS was spin-coated on glass discs. (A, C) Fields of 10 and 5  $\mu$ m, respectively, of the sample diluted 10 times with water. (B, D) The same sample diluted 20-fold prior deposition on the substrate. Fields of 10 and 5  $\mu$ m are shown for comparison. Scale bars, 500 nm.



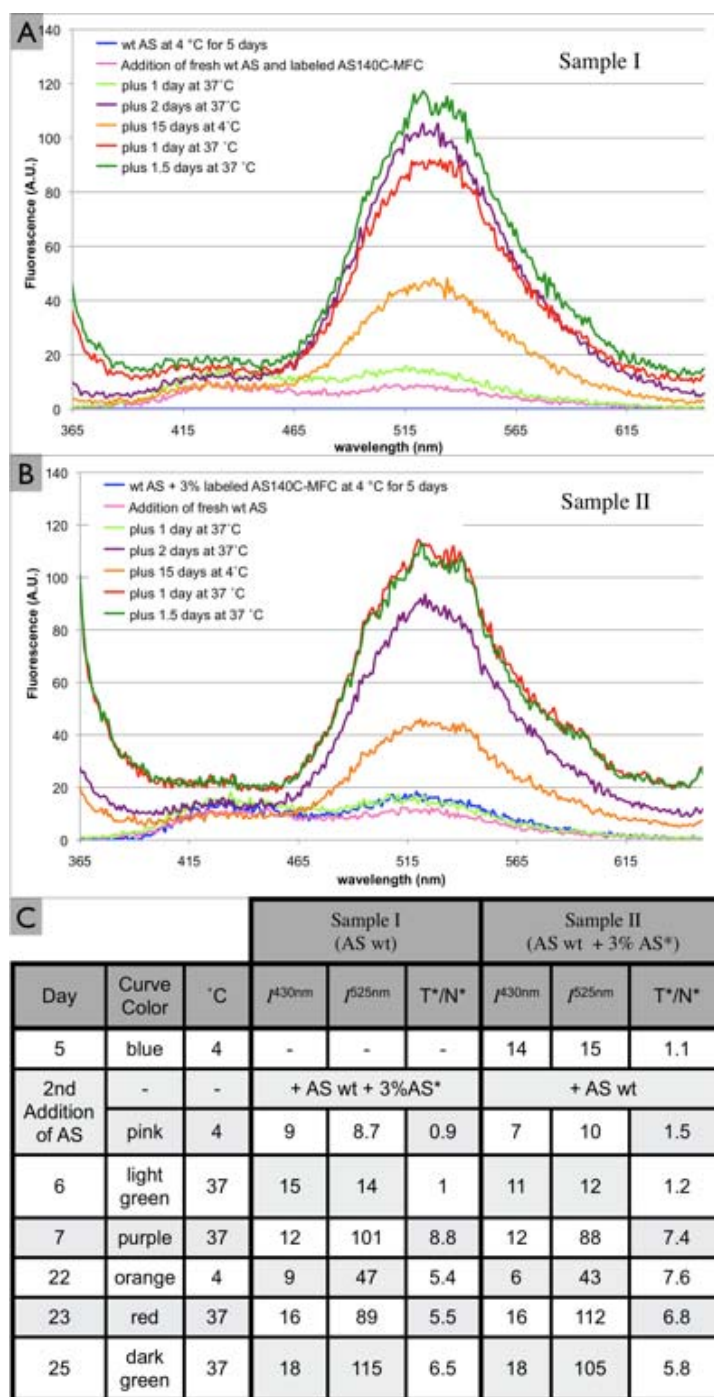

204

205 **FIGURE S11. Aggregation of AS samples differing in initial composition and incubated at various**  
 206 **temperatures.** Two sample were prepared: Sample I, 200  $\mu$ l of 300  $\mu$ M wt AS in Na-PO<sub>4</sub>, pH 7.4, 0.02% NaN<sub>3</sub>; and  
 207 Sample II, equal to sample I plus 3% of labeled AS-A140C-MFC (AS\*). So sample II was initially fluorescent, and  
 208 sample I not. Emission spectra and AFM (see Fig. S12) were used to follow the temporal evolution. Both samples  
 209 were incubated at intermittent temperatures, starting at 4 °C for 5 days (blue curves). After incubation, fresh protein  
 210 was then added: 100  $\mu$ l of 200  $\mu$ M wtAS to both samples, and 3% labeled AS\* to sample I, such that both samples  
 211 now had exactly the same composition. Incubation was then resumed at 37 °C for ~2 days (day 6 and 7 in table, curves  
 212 light green and purple). Samples were then kept at 4 °C for 15 days (day 22 in table, orange curve). Incubation  
 213 continued for ~2-3 days at 37 °C (day 23-25 in table, curves red and dark green). (A, B) Emission spectra, corrected by  
 214 initial unlabeled wtAS spectra and volume dilution upon second addition of protein. (C) Table of fluorescence  
 215 intensities of N\* and T\* bands (430 and 525 nm, respectively), T\*/N\* ratios, days of incubation and incubation  
 216 temperatures. The corresponding AFM images are shown in Fig. S12.

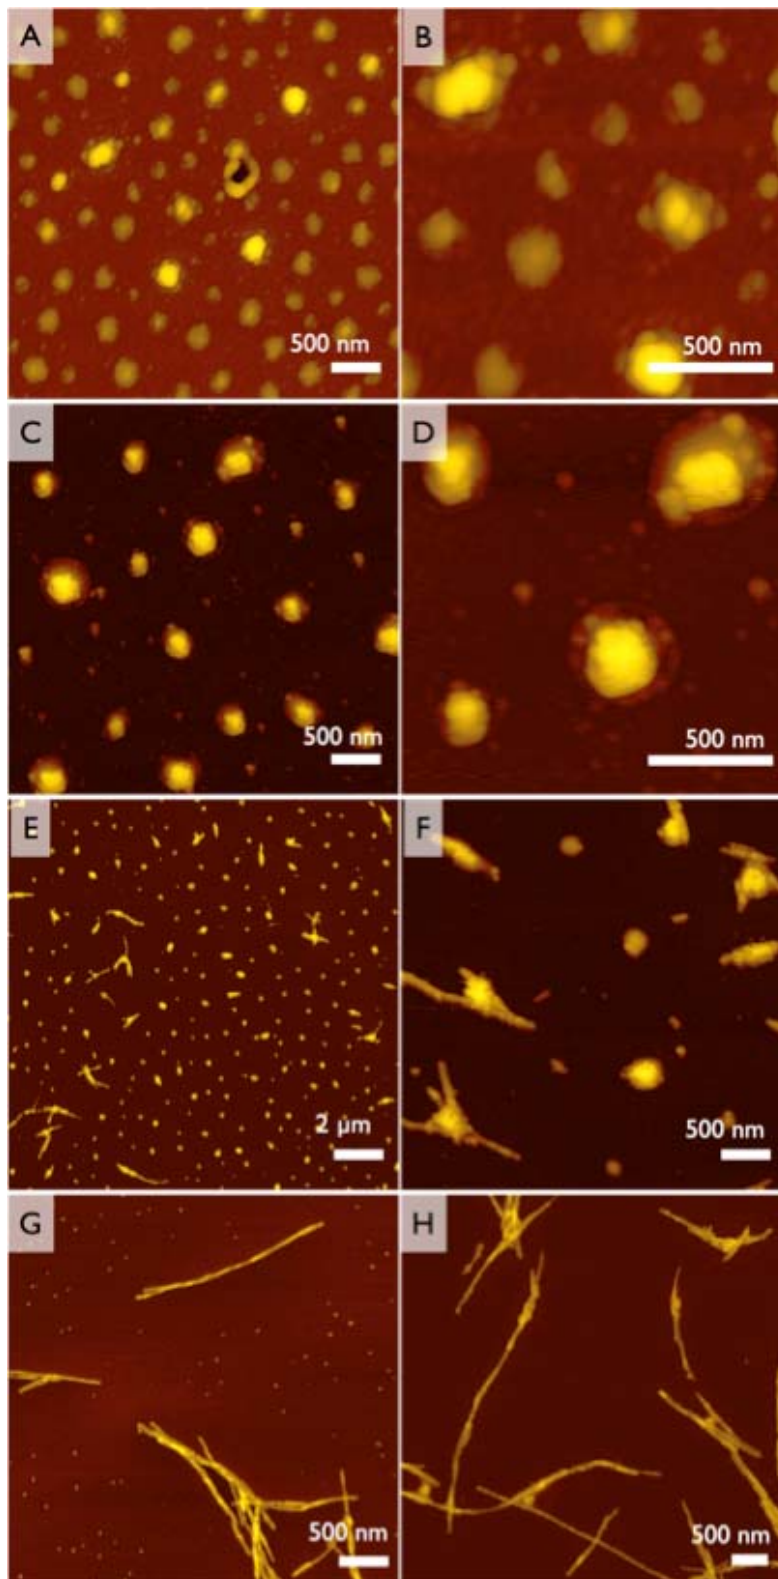

217

218 **FIGURE S12.** AFM images of samples I and II corresponding to Figure S11. (A, B) Latent acunas obtained after 5  
219 days of incubation at 4 °C of AS (day 5, blue curve). (C, D) sample after addition of fresh monomeric AS and  
220 incubated 1 day at 37 °C (day 6, light green curve). (E, F) after incubation for ~2 days at 37 °C (day 7, purple curve).  
221 (G) after incubation during 15 days at 4 °C (day 22, orange curve). (H) Sample incubated further for ~2-3 days at 37  
222 °C (day 25, dark green curve). Panels A, B, E, F and G correspond to sample I. Panels C, D and H correspond to  
223 sample II. Both samples showed similar, comparable structures.



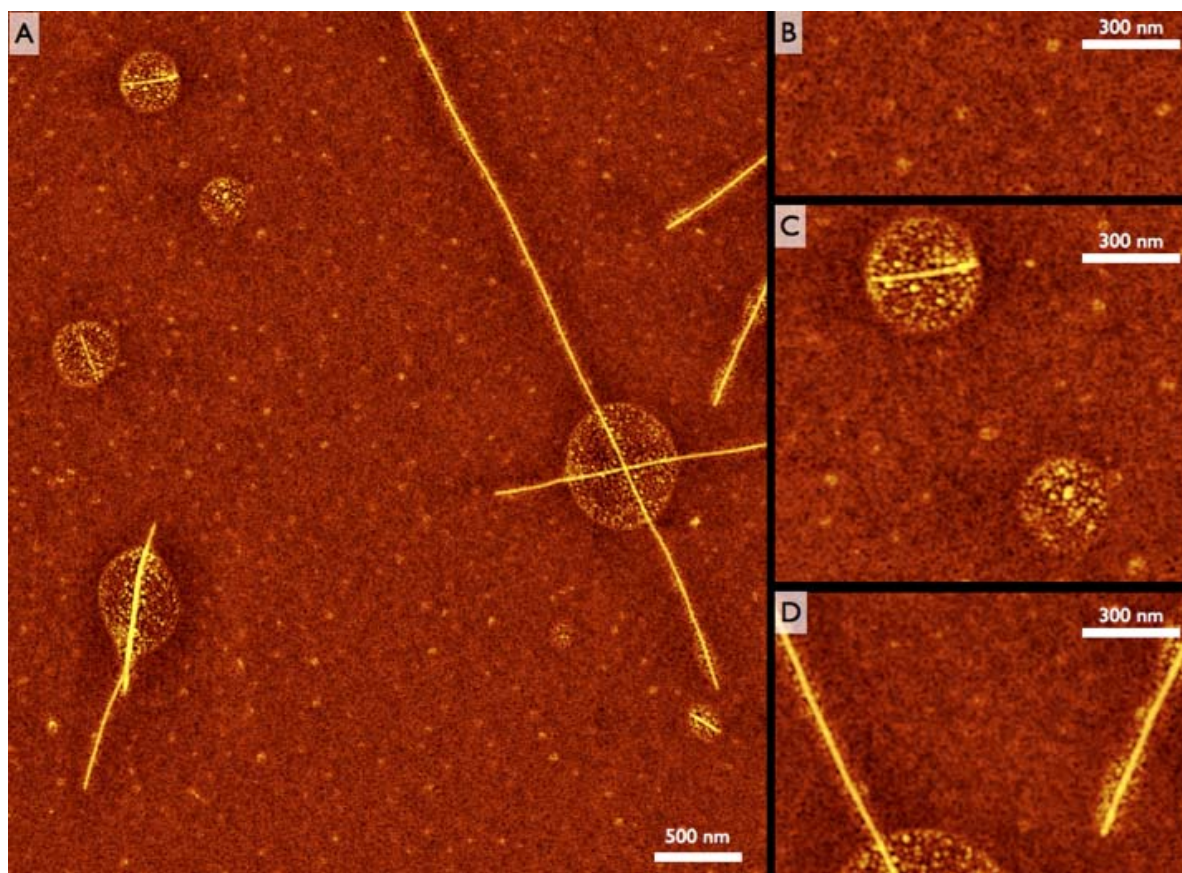

224  
225  
226  
227

**FIGURE S13.** (A) High resolution AFM image of Fig. 1B (main text) after >1 year of storage. (B, C, D) zoom areas of panel A, in which details of the heterogeneous species are evident: *fb*s, latent acunas, productive acunas and *ff*s.

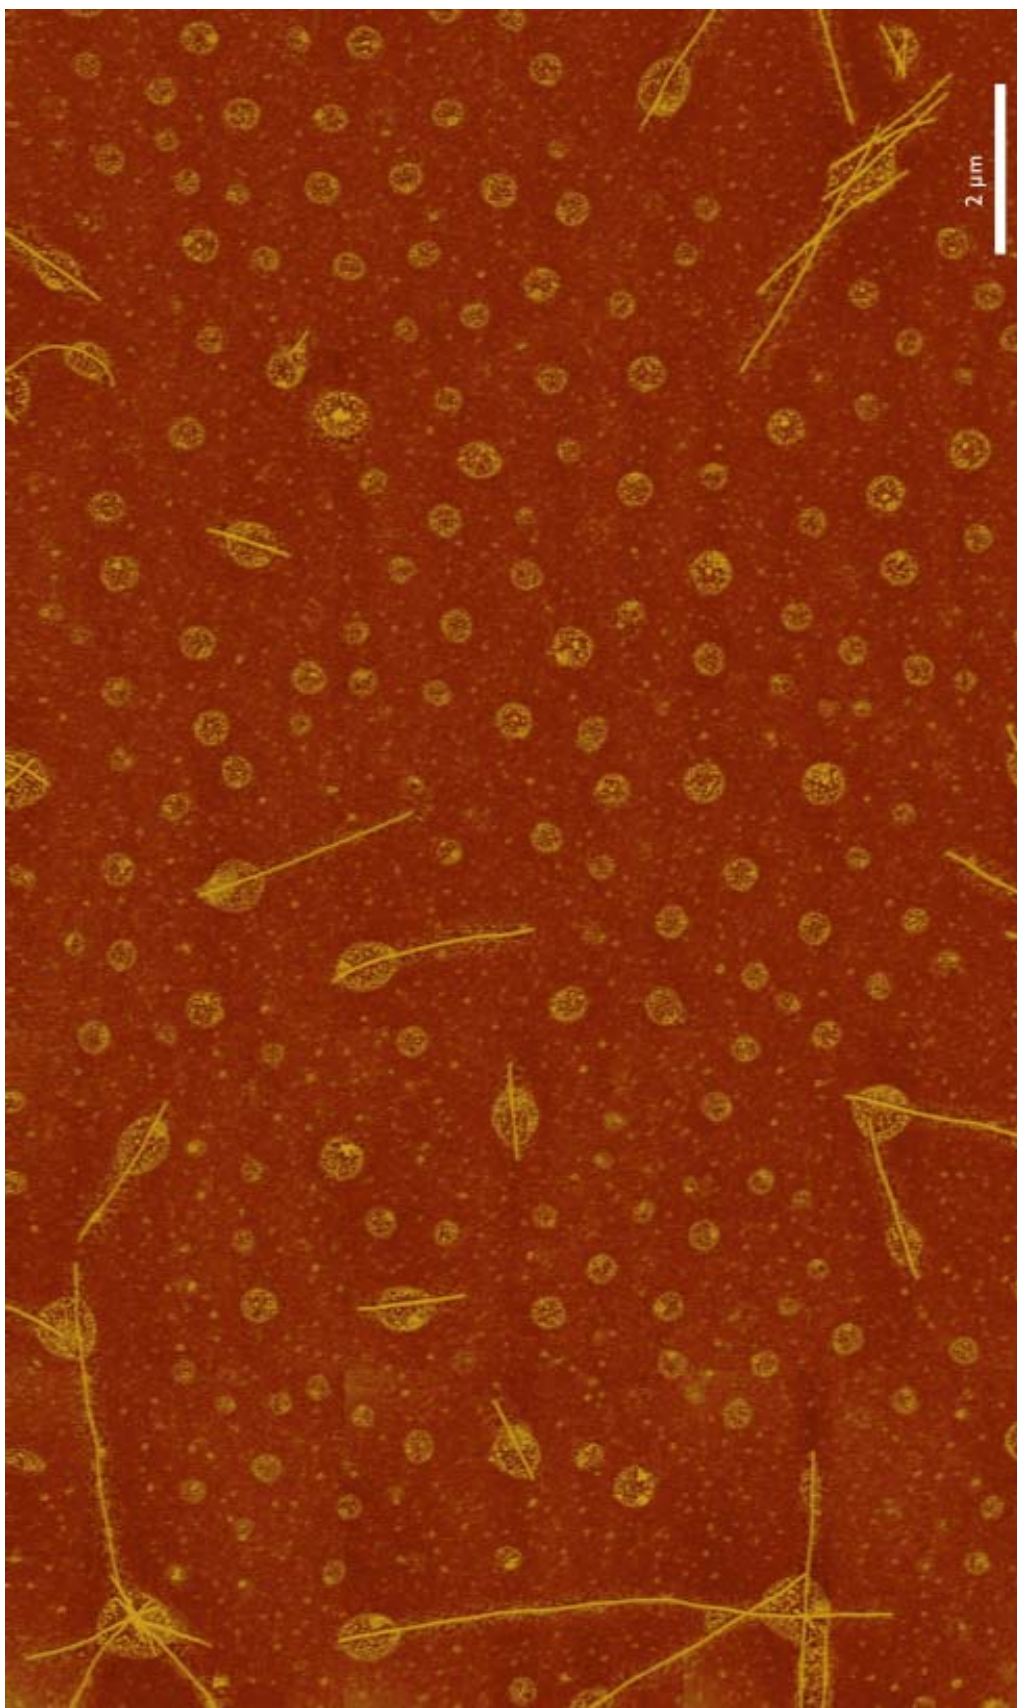

228  
229  
230

**FIGURE S14.** High-resolution AFM image of Fig. 1B (main text) after >1 year of storage. Image dimensions, 20×12 μm. The presence of heterogenous species is evident: *fb*s, latent acunas, productive acunas and *ff*s.

231 **AFM morphological analysis.** In view of the numerous novel structures observed during the  
232 aggregation of AS by AFM sampling, a morphological analysis was carried out in order to define  
233 the distinguishing features of the various supramolecular structures. These were subdivided in  
234 three main groups: a) balls and fuzzy balls (*fb*s; for definitions of these and other designated  
235 entities, see Results), b) latent and productive acunas, and c) fibers and fibrils. Within the last  
236 group it was possible to identify at least three different stages of compaction and entanglement.  
237 The determinations of topographic height were inherently more reliable than of lateral dimensions  
238 in the case of small structures approaching the size of the AFM tip diameter, although in the  
239 presence of partial collapse due to drying, and/or masking as a consequence of being embedded in  
240 an underlying protein layer to an indeterminate degree, the aparent heights would be  
241 underestimates. Images were acquired with Nanoscope IIIA and V and files were opened and  
242 flattened with the DIPimage (Quantitative Imaging Group, Delft University of Technology, The  
243 Netherlands) MATLAB (The MathWorks, Natick, MA) toolbox using a script of Bernd Rieger  
244 and Anthony De Vries based on a published algorithm (3). A batch analysis was performed on  
245 multiple images and the resultant images were saved in floating point, preserving the *z*-scale in  
246 nm. For the group of *fb*s and acunas we measured the distribution of maximal heights after  
247 segmenting the population. Diameters were calculated from the areas using an equivalent circle  
248 model, and shape eccentricity from the ‘*perimeter-to-area*’ (P2A) parameter (DIPimage  
249 subroutine: ‘*Size*’, ‘*SurfaceArea*’).

250 In the case of fibers and fibrils, the height, diameter, and periodicity were determined using a  
251 similar procedure. In these cases selective thresholding (DIPimage subroutine: ‘*background*’  
252 threshold) was used to distinguish the analysis of fibers from *fuzziness*. The diameters of fuzzy  
253 fibers (*ff*s) were determined by distance transforms (DIPimage subroutine: ‘*Size*’, ‘*Max Val*’,  
254 ‘*SurfaceArea*’), and of the denuded fibers (*df*s) and mature amyloid fibrils (*maf*s) from the  
255 combination of the perimeters and areas of equivalent rectangles (DIPimage subroutine: ‘*Size*’,  
256 ‘*SurfaceArea*’). The periodicity was computed by fitting a sine function to the longitudinal profile  
257 through central axis of fibers and fibrils. Statistical analyses were applied to determine means and  
258 standard deviations (Table 1).

259

## 260 **Cryo-electron tomography**

261 **Specimen preparation.** Copper grids (Fig. S15a) were rinsed in PBS (Biological Industries) and  
262 coated with a thin carbon film as previously described (holey carbon support film (4). The grids  
263 were allowed to fully dry before application of 2.5  $\mu$ L droplet of sample suspension (wtAS + 2.5%  
264 AS-A140C-MFC, incubated for 3-4 days at 4 °C). After being blotted using Vitrobot Mark III  
265 (FEI, Eindhoven), the samples were embedded in vitreous ice by plunging the grids into liquid N<sub>2</sub>-  
266 cooled ethane, thereby preserving them in a close-to-native conformation without fixation or  
267 staining (5). The grids were then transferred to liquid N<sub>2</sub> and inserted into a 200-kV JEM2100  
268 LaB6 cryo-electron microscope (JEOL, Tokyo) with a  $\pm 70^\circ$  tilt cryoholder (Gatan, Pleasanton).



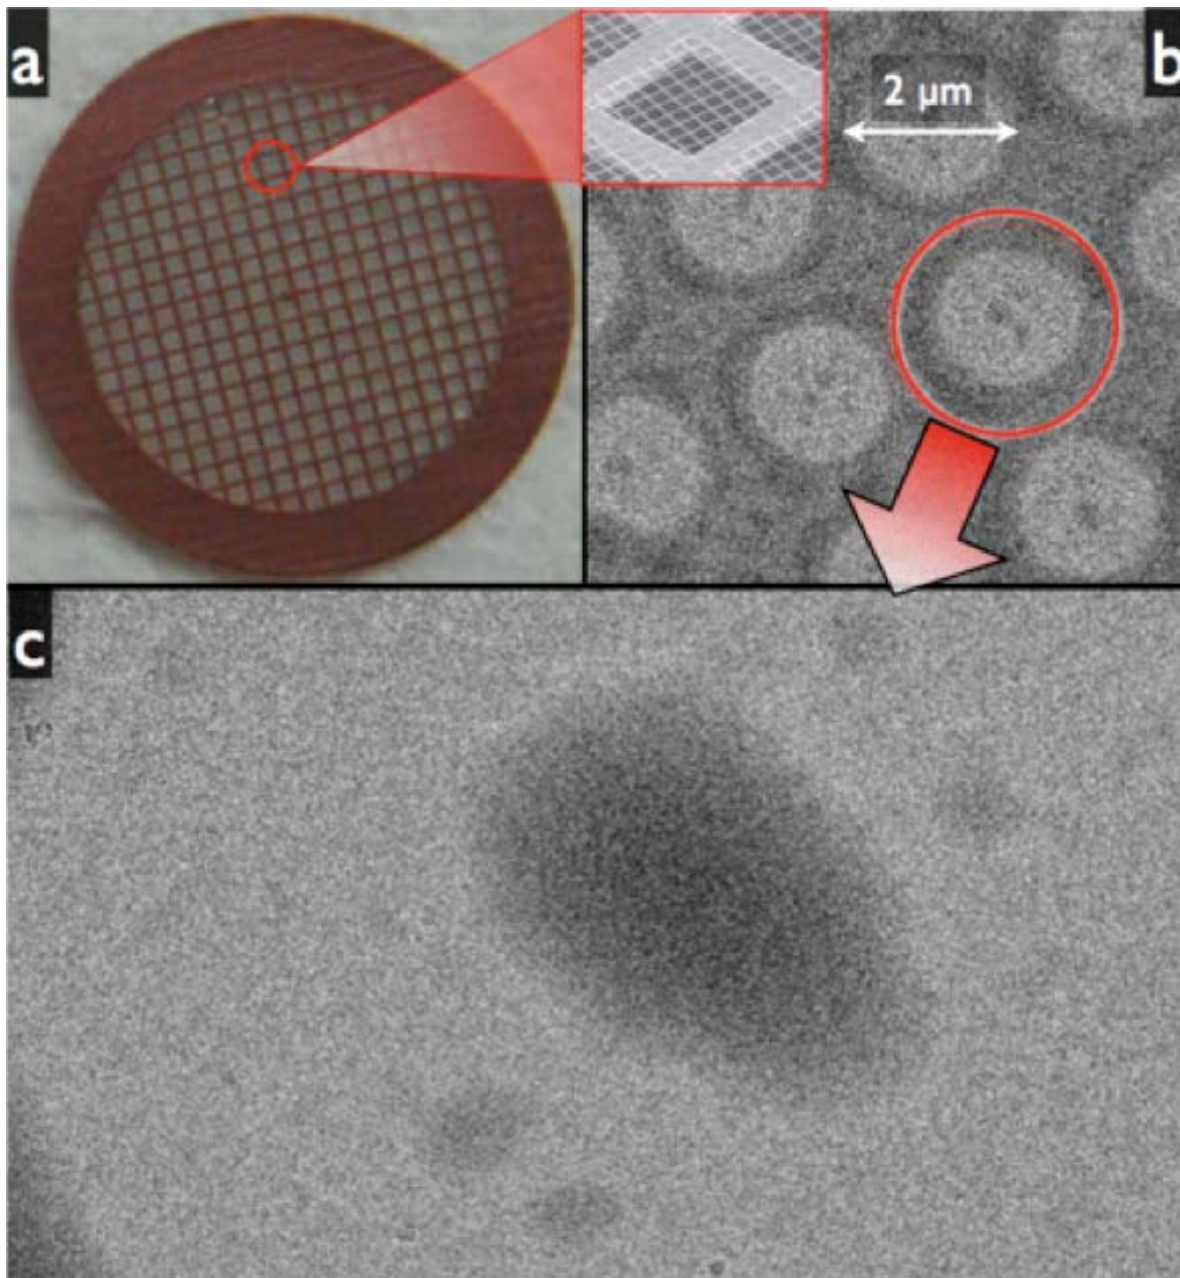

269

270 **FIGURE S15.** Cryo-EM grid and single tomograms of wtAS sample incubated 3-5 days at 4 °C (latent acunas). (a)  
271 Carbon-coated 200-mesh copper grid. (b) single cryo-ET tomogram of grid with oblong structures (latent acunas)  
272 homogeneously deposited over the grid. (c) single cryo-ET tomogram of a wtAS acuna (for a complete 3D-tomogram  
273 and annotation see Fig. 4).

274 **Electron tomography.** Single-axis tilt series were acquired under low-dose conditions with  
275 SerialEM tomographic software (6) and targeted at a ~6 μm under-focus. The angular range of the  
276 tilt series was -60° to +62°, sampled in 2° tilt increments. Because of the increased specimen  
277 thickness at higher tilt angles, the exposure time was varied according to  $(\cos \alpha)^{-1}$ . The cumulative  
278 dose of incident electrons for recording the tilt series was below 70 electrons/Å<sup>2</sup>.



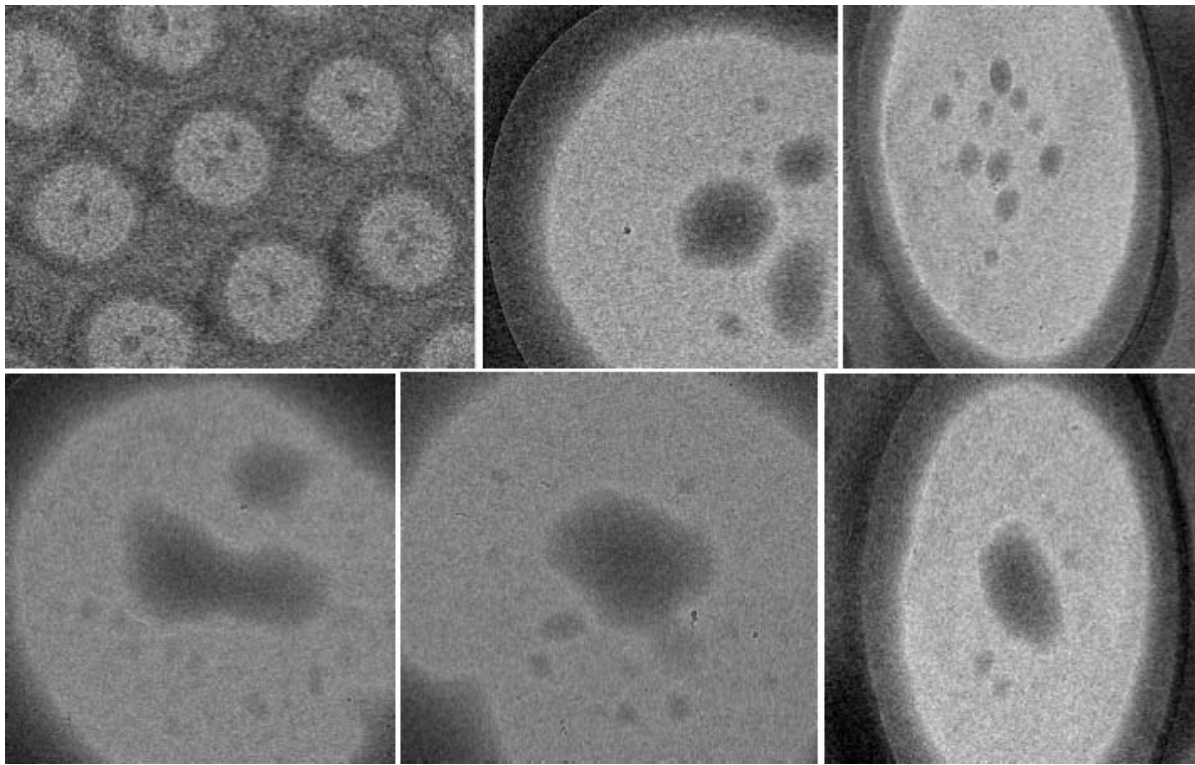

279

280

281

**FIGURE S16.** Cryo-EM single tomograms of wtAS sample incubated 3-5 days at 4 °C (latent acunas). A variety of shapes are apparent although the sizes are fairly regular. Similar forms are observed in liquid AFM (Fig. S9).

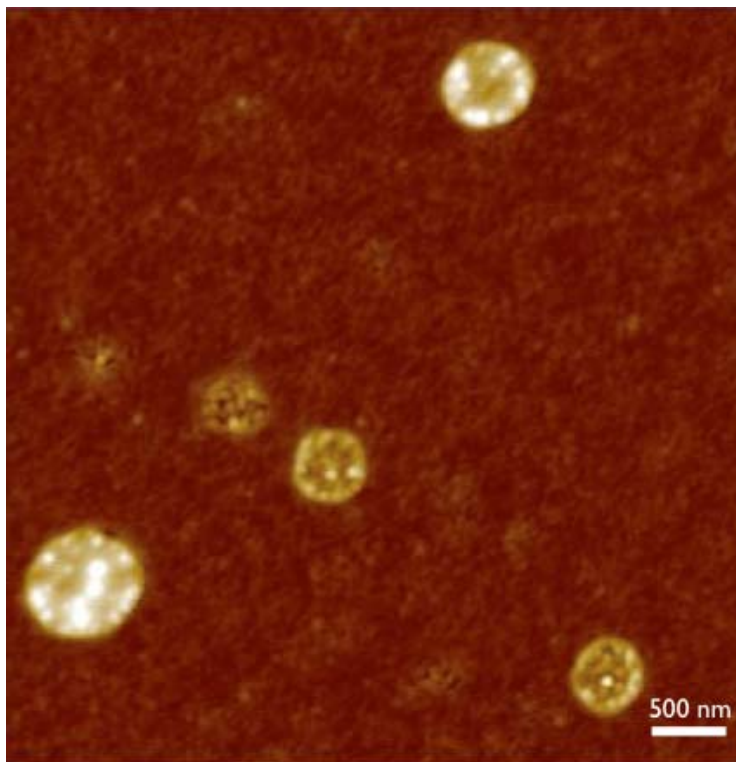

282

283

284

285

**FIGURE S17.** AFM image of latent acunas of wtAS incubated 3-5 days at 4 °C; preparation that was analyzed by Cryo-ET (Figs. 4 (man text), S15, 16).

286

287

**Supporting References**

- 288 1. Yushchenko, D. A., J. A. Fauerbach, S. Thirunavukkuarasu, E. A. Jares-Erijman, and T. M.  
289 Jovin. 2010. Fluorescent ratiometric MFC probe sensitive to early stages of  $\alpha$ -synuclein  
290 Aggregation. *J. Am. Chem. Soc.* 132:7860-7861.
- 291 2. Thirunavukkuarasu, S., E. A. Jares-Erijman, and T. M. Jovin. 2008. Multiparametric  
292 fluorescence detection of early stages in the amyloid protein aggregation of pyrene-labeled  
293  $\alpha$ -synuclein. *J. Mol. Biol.* 378:1064-1073.
- 294 3. Starink, J. P. P., and T. M. Jovin. 1996. Background correction in scanning probe  
295 microscope recordings of macromolecules. *Surf. Sci.* 359:291-305.
- 296 4. Ermantraut, E., K. Wohlfart, and W. Tichelaar. 1998. Perforated support foils with  
297 predefined hole size, shape and arrangement. *Ultramicroscopy* 74:75-81.
- 298 5. Dubochet, J., M. Adrian, J. Chang, J. Homo, J. Lepault, A. McDowell, and P. Schultz. .  
299 1988. Cryo-electron microscopy of vitrified specimens. *Q. Rev. Biophys.* 21:129-288.
- 300 6. Mastronarde, D. 2003 SerialEM A program for automated tilt series acquisition on Tecnai  
301 microscopes using prediction of specimen position. *Microsc. Microanal.* 9:1182-1183.
